# Supplementary material
Source: PubMed Central journal article supplement (PMC5759031)

## **Supporting Information**

# **Deep learning accurately predicts estrogen receptor status in breast cancer metabolomics data**

Fadhl M Alakwaa<sup>1</sup>, Kumardeep Chaudhary<sup>1</sup>, Lana X Garmire<sup>1,2\*</sup>

<sup>1</sup>Epidemiology Program, University of Hawaii Cancer Center, Honolulu, HI 96813, USA.

<sup>2</sup>Molecular Biosciences and Bioengineering Graduate Program, the University of Hawaii at Manoa,

Honolulu, HI 96822, USA.

\*To whom correspondence should be addressed.

Lana X Garmire, PhD

Associate Professor,

Email address: [lgarmire@cc.hawaii.edu](mailto:lgarmire@cc.hawaii.edu)

Phone: +1 (808) 441-8193

## **Table of contents:**

**Figure S1:** (A) The effect of reduction of sample size in the performance of the DL and other machine learning algorithms. (B) The effect of reduction of feature size in the performance of the DL and other machine learning algorithms.

**Figure S2:** DL based top 20 important metabolites. (A) Heatmap and (B) Box plot of the top 20 important metabolites extracted from the DL model.

**Figure S3:** Heatmap of the metabolites (columns) with most contribution to the activation value of the top hidden nodes (rows).

**Table S1:** The list of the top 20 important features.

**Table S2:** The running time of seven algorithms on the metabolomics dataset.

**Script S1:** R code of the preprocessing, models training and testing

Figure S1

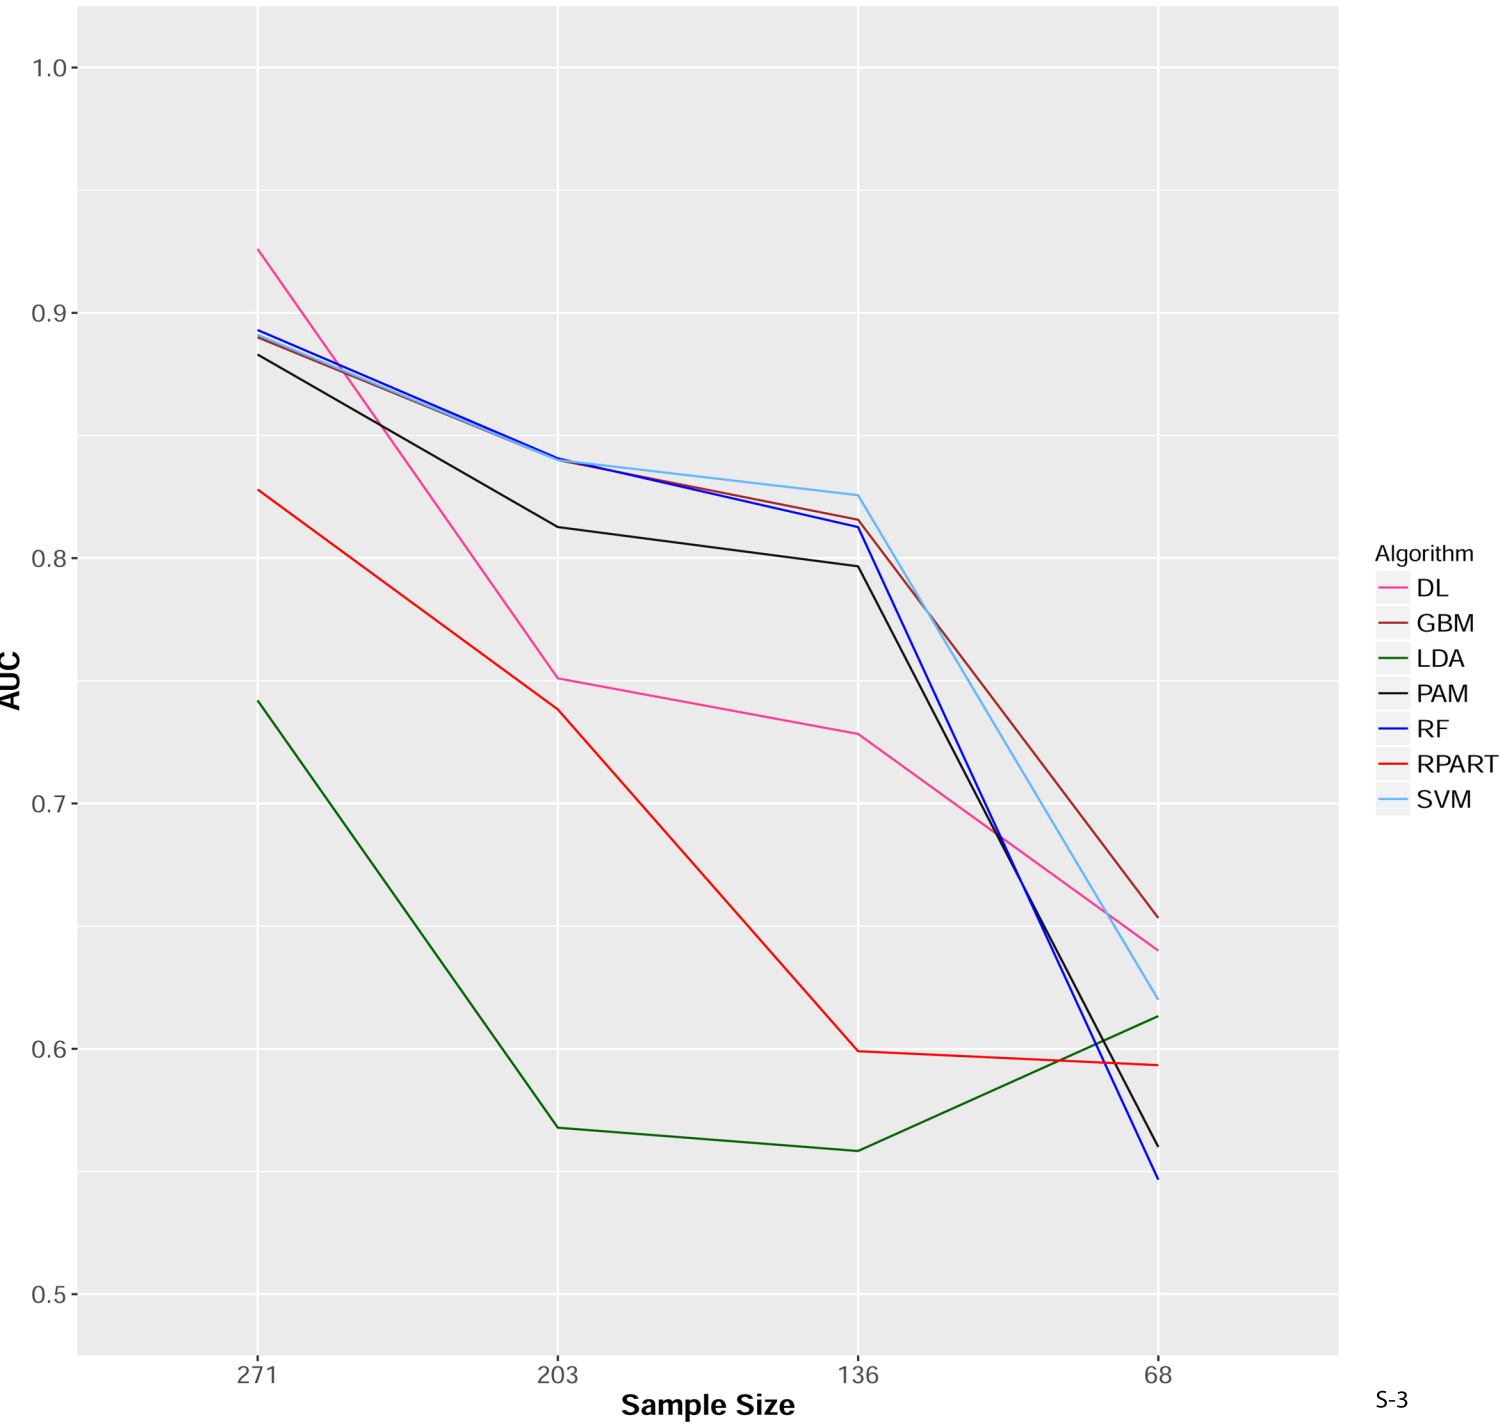

Figure S2

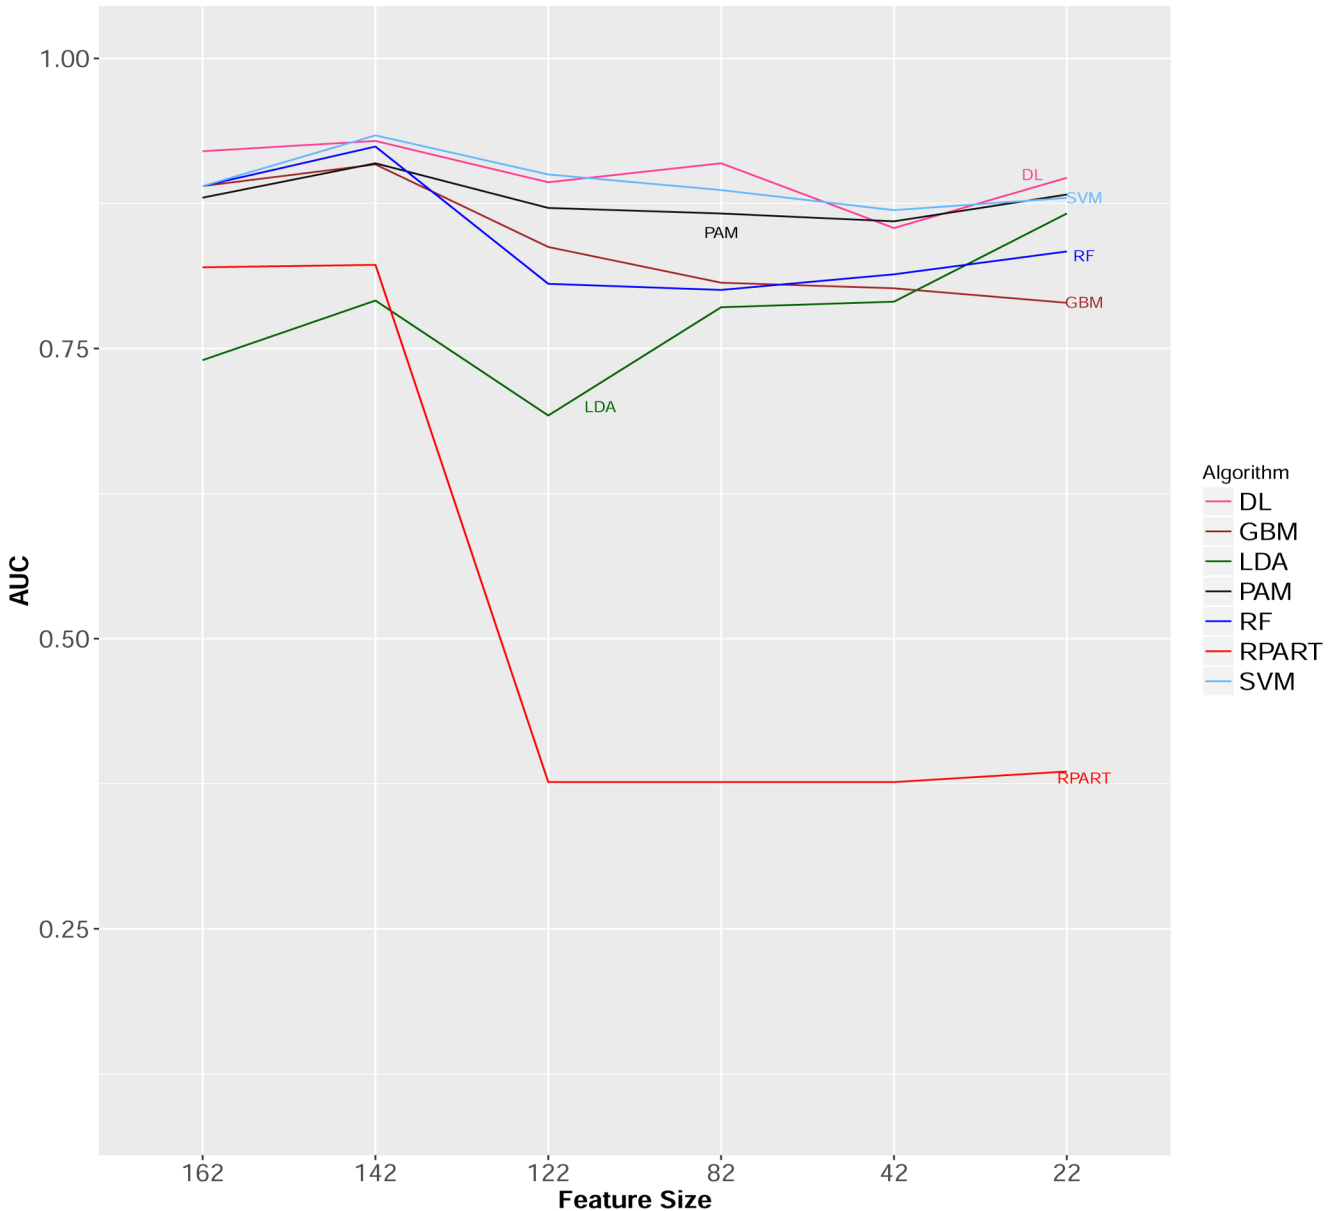



Figure S3

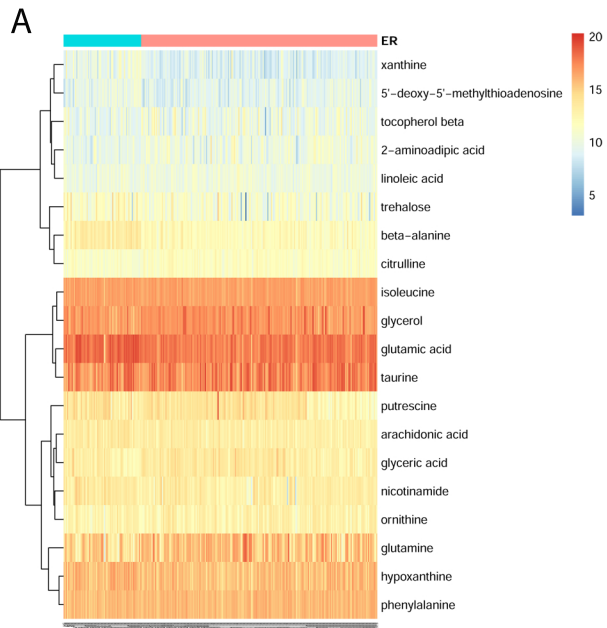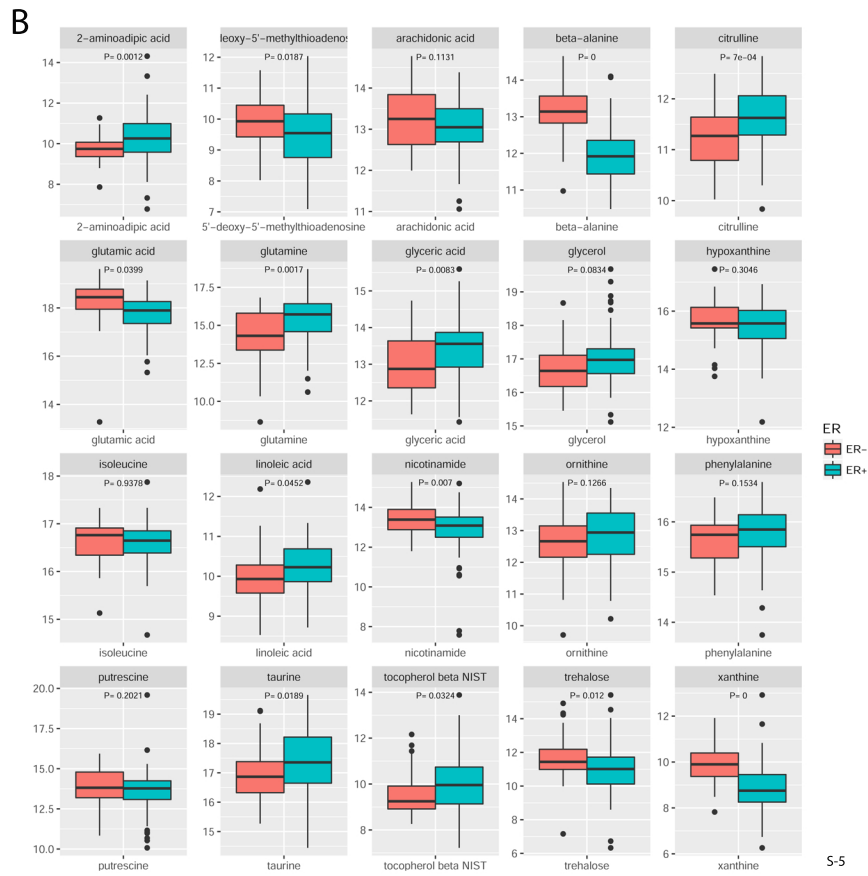

Supplement: pr7b00595_si_001.pdf [file pr7b00595_si_001.pdf]
